# Supplementary material for: Ionic liquids from cationic palladium(ii) chelate complexes: preparation, thermal properties, and crystal structures
Source: Royal Society of Chemistry journal article supplement (doi:10.1039/c4dt00192c), 2014-01-01
Supplement: c4dt00192c1.pdf [file c4dt00192c1.pdf]

Electronic Supporting Information

## Ionic liquids from cationic palladium(II) chelate complexes: Preparation, thermal properties, and crystal structures†

Hitoshi Hosokawa, Yusuke Funasako and Tomoyuki Mochida\*

Department of Chemistry, Graduate School of Science, Kobe University, Rokkodai, Nada, Hyogo  
657-8501, Japan.

\*Corresponding author E-mail: [tmochida@platinum.kobe-u.ac.jp](mailto:tmochida@platinum.kobe-u.ac.jp)

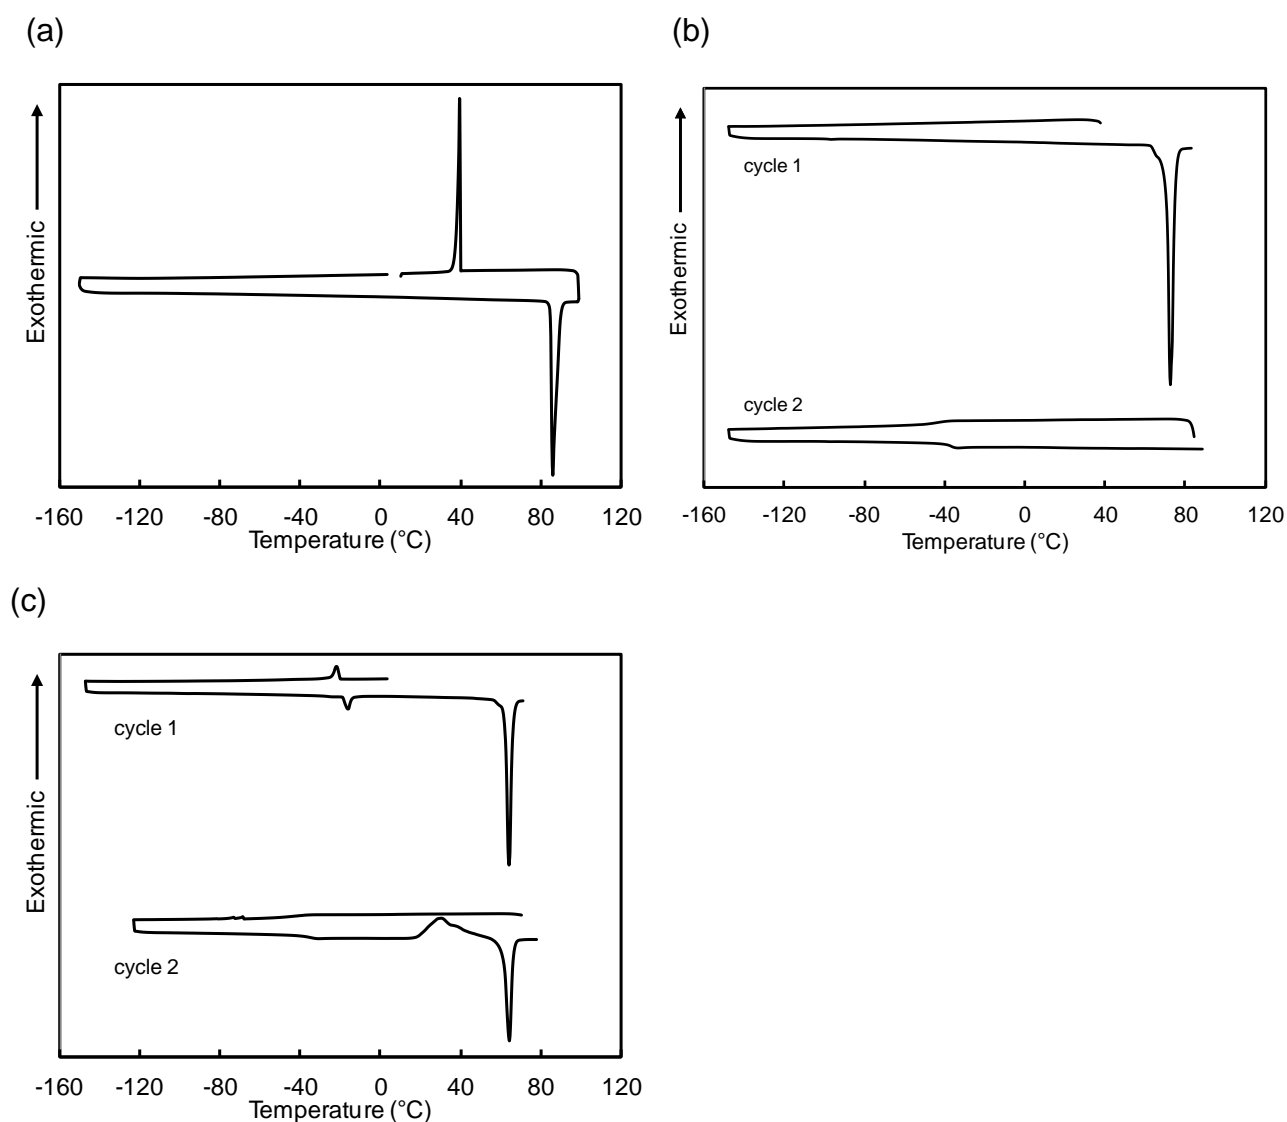

**Fig. S1** DSC traces of (a)  $[\text{Pd}(\text{acac})(\text{Me}_4\text{en})]\text{Tf}_2\text{N}$  (**1**), (b)  $[\text{Pd}(\text{acac})(\text{BuMe}_3\text{en})]\text{Tf}_2\text{N}$  (**2**), and (c)  $[\text{Pd}(\text{C}_8\text{-acac})(\text{Me}_4\text{en})]\text{Tf}_2\text{N}$  (**3**).

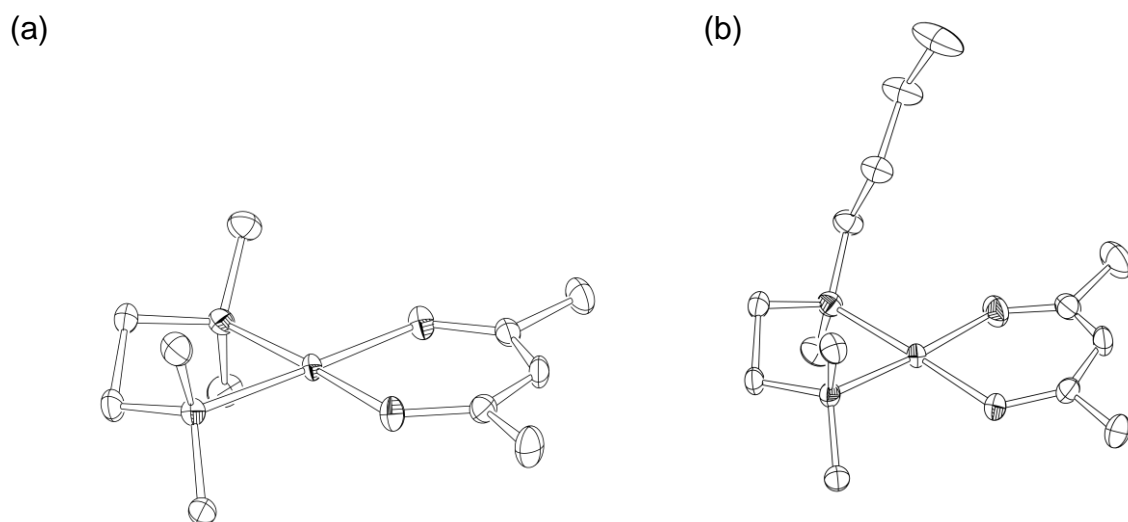

**Fig. S2** ORTEP drawings of the cations in (a) **1** and (b) **2**.

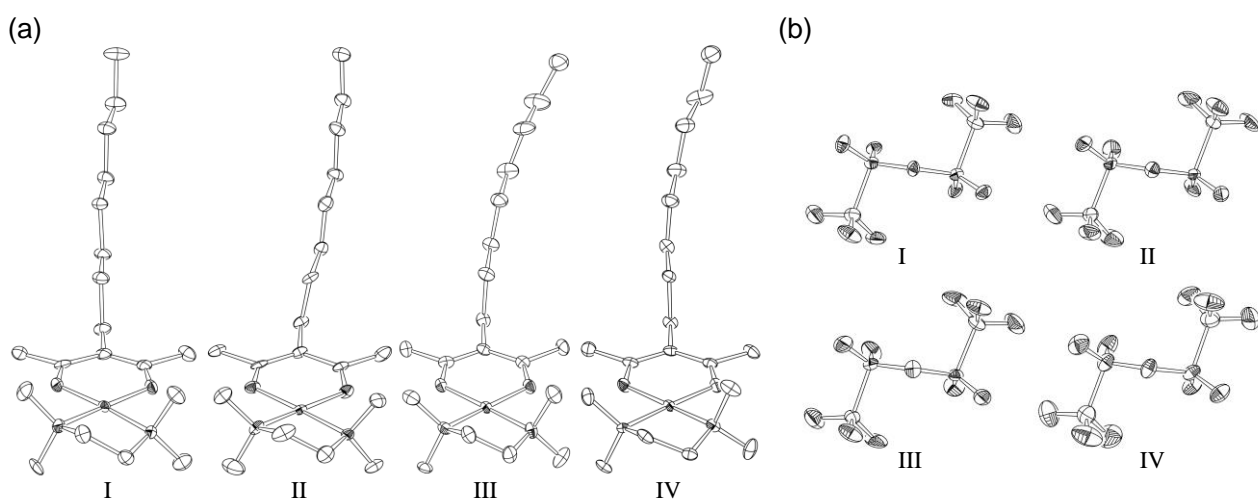

**Fig. S3** ORTEP drawings of the crystallographically independent (a) cations and (b) anions in **3**.
